# Supplementary material for: Synergistic effects of promoters on adjusting the reaction pathway over iron catalysts for CO2 hydrogenation to CO
Source: Royal Society of Chemistry journal article supplement (doi:10.1039/d4cy01354a), 2025-01-01
Supplement: d4cy01354a1.pdf [file d4cy01354a1.pdf]

Supporting Information

The synergistic effects of promoters on adjusting reaction pathway over  
iron catalysts for CO<sub>2</sub> hydrogenation to CO

Zhongtao Sun<sup>a</sup>, Jielang Huang<sup>a</sup>, Ling Zhou<sup>b\*</sup>, Yi Zhang<sup>a\*</sup>

<sup>a</sup> College of Chemical Engineering, Beijing University of Chemical Technology, Beijing, 100029,  
PR China

<sup>b</sup> Modern Agricultural Engineering Key Laboratory at Universities of Education Department of  
Xinjiang Uygur Autonomous Region, Tarim University, Alar, Xinjiang Uygur Autonomous  
Region 843300, China

\*Corresponding Authors: Tel & Fax: 86-10-64436991

Email: zhoul-007@163.com (L.Z.); yizhang@mail.buct.edu.cn (Y.Z.)

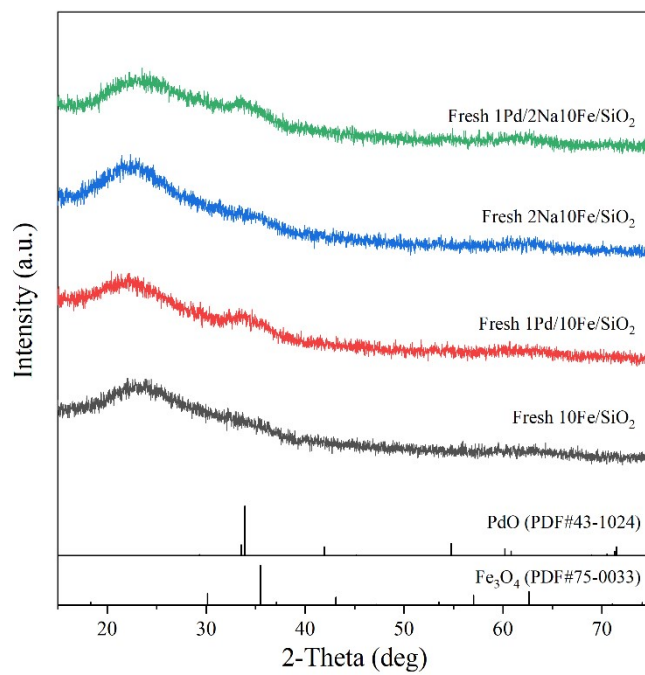

**Fig. S1** XRD pattern of fresh catalysts

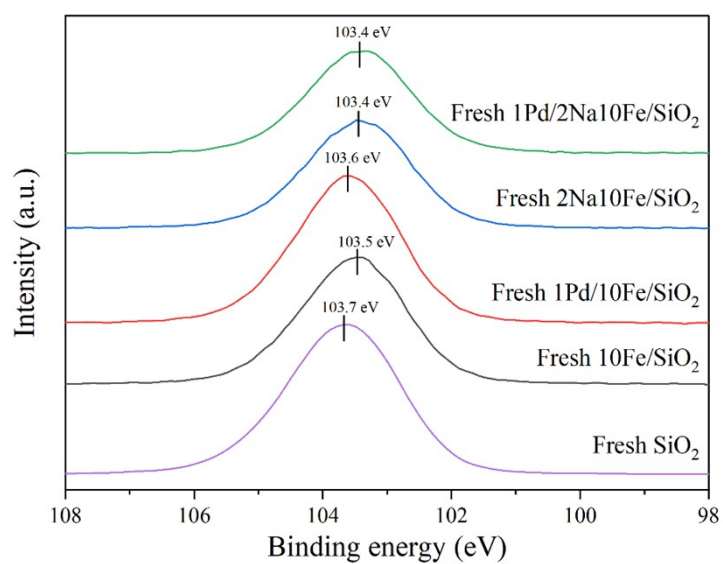

**Fig. S2** Si 2p XPS spectra for various fresh catalysts

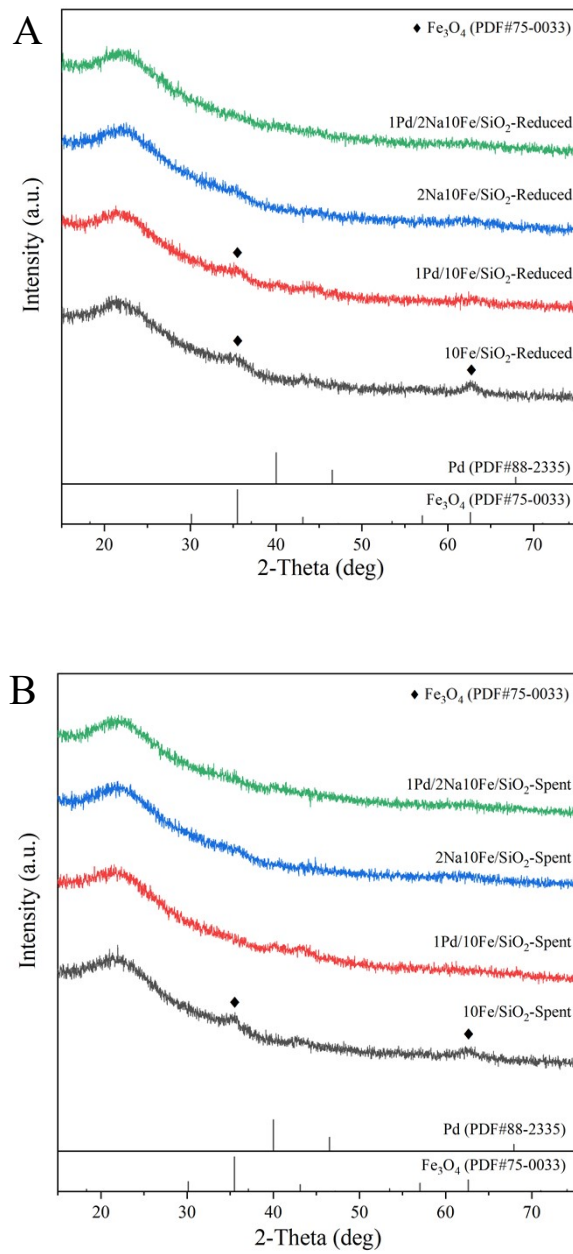

Fig. S3 XRD pattern of reduced and spent catalysts. (A) reduced catalysts, (B) spent catalysts

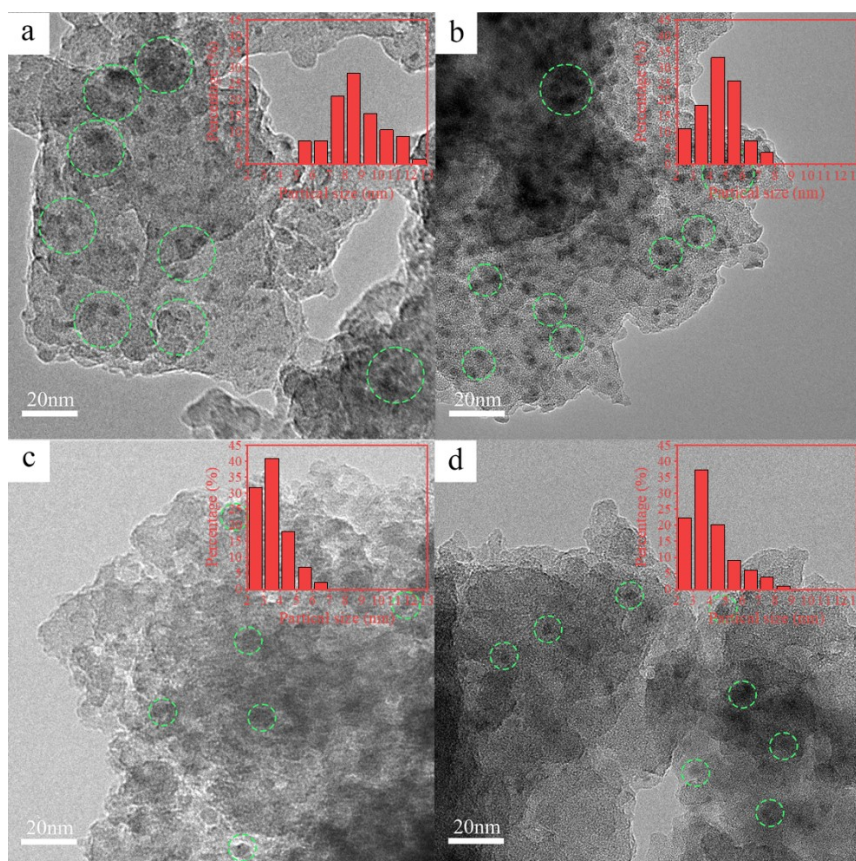

**Fig. S4** TEM images of different spent catalysts: (a) 10Fe/SiO<sub>2</sub>; (b) 1Pd/10Fe/SiO<sub>2</sub>; (c) 2Na10Fe/SiO<sub>2</sub>; (d) 1Pd/2Na10Fe/SiO<sub>2</sub>

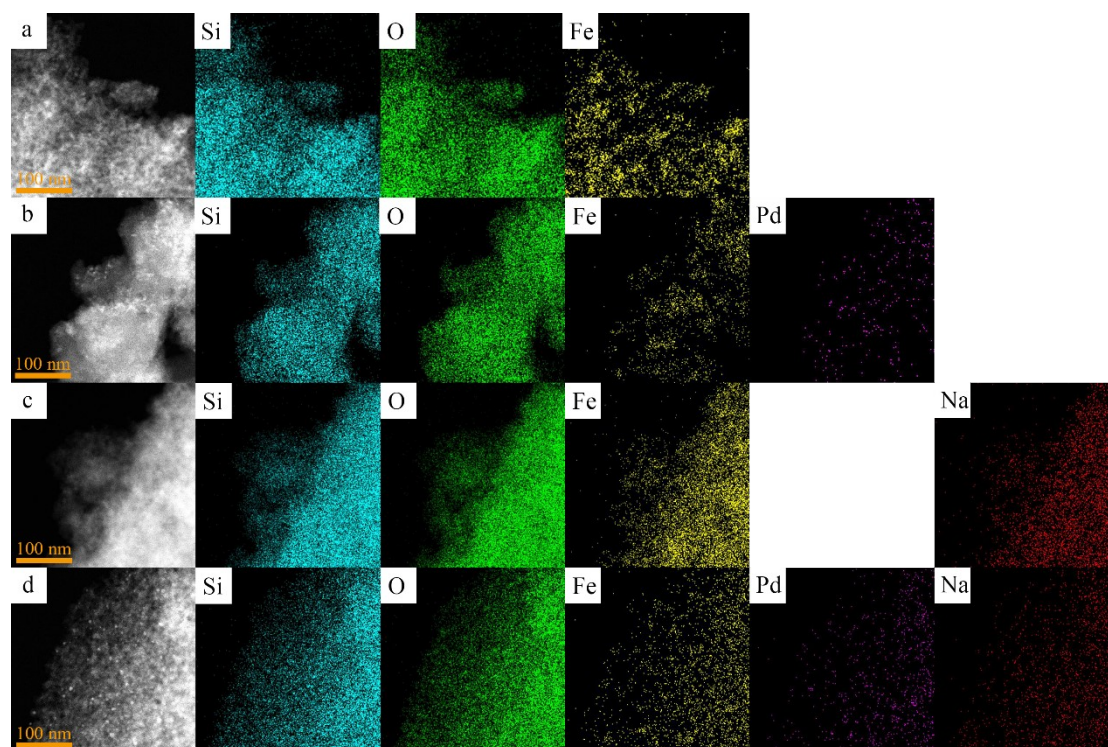

**Fig. S5** STEM-EDX elemental mapping of different spent catalysts: (a) 10Fe/SiO<sub>2</sub>; (b) 1Pd/10Fe/SiO<sub>2</sub>; (c) 2Na10Fe/SiO<sub>2</sub>; (d) 1Pd/2Na10Fe/SiO<sub>2</sub>

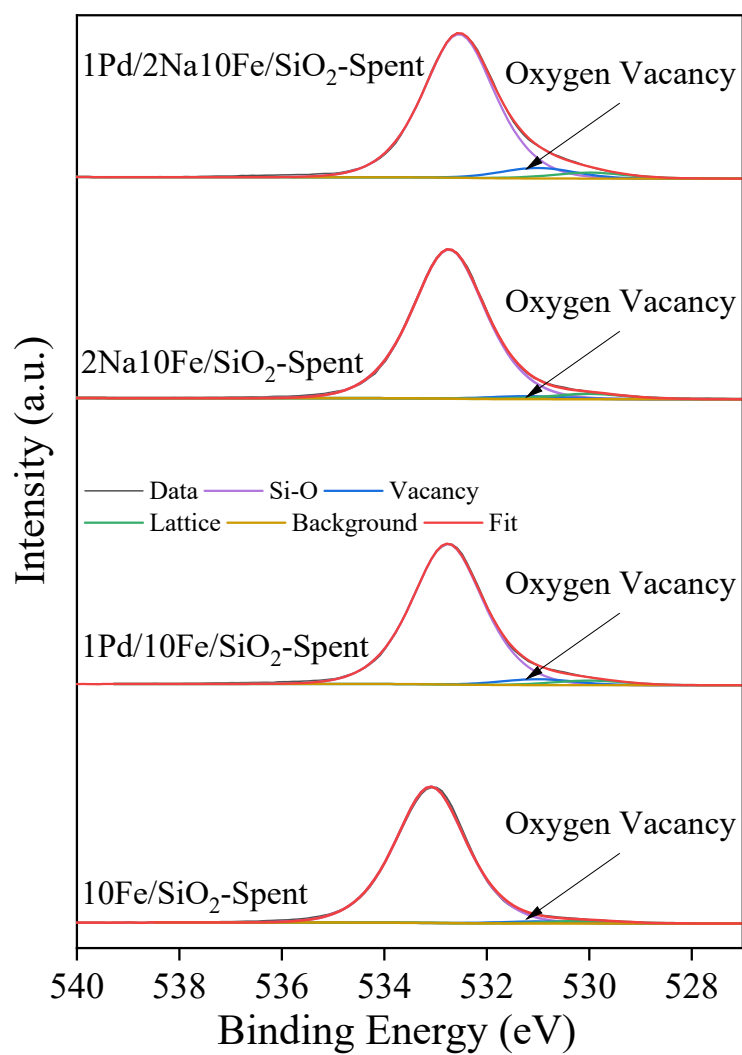

**Fig. S6** O 1s XPS spectra for various spent catalysts

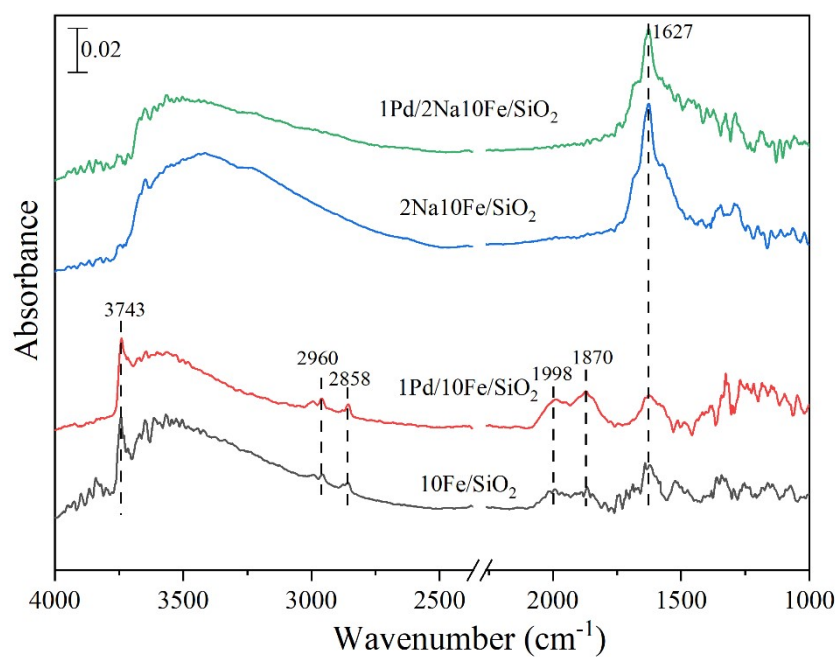

**Fig. S7** In situ CO<sub>2</sub>-DRIFTS results after CO<sub>2</sub> adsorption for various catalysts

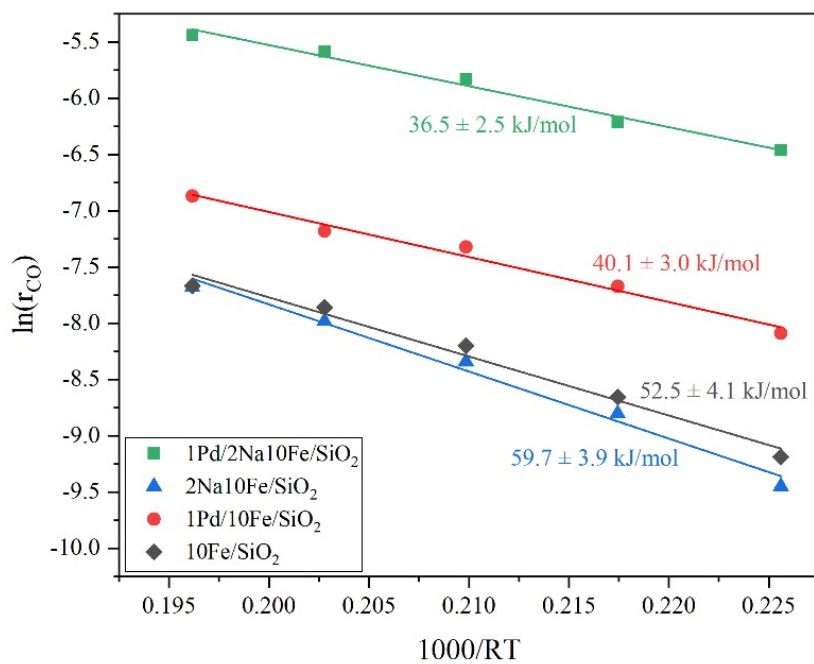

**Fig. S8** Arrhenius plot for various catalysts



**Table S1.** Catalytic performance of as-prepared catalysts <sup>a</sup>.

| Catalysts                    | Conv. (%)       | Sel. (%) | Sel. (%)                                   | Sel. (%)                                      |
|------------------------------|-----------------|----------|--------------------------------------------|-----------------------------------------------|
|                              | CO <sub>2</sub> | CO       | C <sub>x</sub> H <sub>y</sub> <sup>b</sup> | C <sub>x</sub> H <sub>y</sub> OH <sup>c</sup> |
| 10Fe/SiO <sub>2</sub>        | 2.8             | 46.4     | 46.5                                       | 7.1                                           |
| 1Pd/10Fe/SiO <sub>2</sub>    | 6.3             | 42.8     | 48.8                                       | 8.4                                           |
| 2Na10Fe/SiO <sub>2</sub>     | 1.0             | 93.5     | 4.7                                        | 1.8                                           |
| 1Pd/2Na10Fe/SiO <sub>2</sub> | 13.2            | 99.7     | 0.1                                        | 0.2                                           |
| 1Pd/SiO <sub>2</sub>         | 5.5             | 92.7     | 0.6                                        | 6.7                                           |

<sup>a</sup> Reaction conditions: 300°C, 3.0 MPa, H<sub>2</sub>/CO<sub>2</sub> = 3, GHSV = 1600 mL/g<sub>cat</sub> h<sup>-1</sup>.

<sup>b</sup> Include C<sub>1</sub>-C<sub>7</sub> hydrocarbon.

<sup>c</sup> Include C<sub>1</sub>-C<sub>3</sub> alcohol.

**Table S2.** Elemental compositions of as-prepared detected by XRF and ICP-OES.

| Samples                      | Weight content <sup>a</sup> (%) |      |      |     |     | Weight content of different species <sup>b</sup> (%) |      |      |
|------------------------------|---------------------------------|------|------|-----|-----|------------------------------------------------------|------|------|
|                              | O                               | Si   | Fe   | Na  | Pd  | Fe                                                   | Na   | Pd   |
| 10Fe/SiO <sub>2</sub>        | 49.6                            | 39.3 | 11.0 | 0.0 | 0.0 | 9.00                                                 | -    | -    |
| 1Pd/10Fe/SiO <sub>2</sub>    | 49.2                            | 38.9 | 11.1 | 0.0 | 0.9 | 8.12                                                 | -    | 0.71 |
| 2Na10Fe/SiO <sub>2</sub>     | 49.1                            | 38.4 | 10.9 | 1.6 | 0.0 | 8.67                                                 | 1.75 | -    |
| 1Pd/2Na10Fe/SiO <sub>2</sub> | 48.5                            | 37.7 | 11.2 | 1.7 | 0.9 | 8.41                                                 | 1.73 | 0.70 |

<sup>a</sup> detected by XRF.

<sup>b</sup> detected by ICP-OES.



**Table S3.** Physical properties of as-prepared catalysts.

| Samples                      | Surface area <sup>a</sup> (m <sup>2</sup> /g) | Pore volume <sup>b</sup> (cm <sup>3</sup> /g) | Pore size <sup>b</sup> (nm) |
|------------------------------|-----------------------------------------------|-----------------------------------------------|-----------------------------|
| SiO <sub>2</sub>             | 496.4                                         | 0.78                                          | 4.9                         |
| 10Fe/SiO <sub>2</sub>        | 414.6                                         | 0.58                                          | 5.6                         |
| 1Pd/10Fe/SiO <sub>2</sub>    | 409.6                                         | 0.59                                          | 4.9                         |
| 2Na10Fe/SiO <sub>2</sub>     | 339.4                                         | 0.58                                          | 5.6                         |
| 1Pd/2Na10Fe/SiO <sub>2</sub> | 348.9                                         | 0.55                                          | 4.9                         |

a calculated by BET method

b calculated by BJH method

**Table S4.** The results of XPS for Fe 2p<sub>3/2</sub>

| Catalysts                             | Binding energy (eV)  |                  | Content (atom%)  |                  |
|---------------------------------------|----------------------|------------------|------------------|------------------|
|                                       | Fe 2p <sub>3/2</sub> |                  | Fe <sup>2+</sup> | Fe <sup>3+</sup> |
|                                       | Fe <sup>2+</sup>     | Fe <sup>3+</sup> |                  |                  |
| 10Fe/SiO <sub>2</sub> -Reduced        | 710.2                | 711.5            | 6.6              | 93.4             |
| 1Pd/10Fe/SiO <sub>2</sub> -Reduced    | 709.8                | 711.3            | 14.8             | 85.2             |
| 2Na10Fe/SiO <sub>2</sub> -Reduced     | 709.6                | 711.3            | 4.2              | 95.8             |
| 1Pd/2Na10Fe/SiO <sub>2</sub> -Reduced | 709.5                | 711.3            | 10.2             | 89.8             |
| 10Fe/SiO <sub>2</sub> -Spent          | 710.1                | 711.5            | 17.2             | 82.8             |
| 1Pd/10Fe/SiO <sub>2</sub> -Spent      | 709.7                | 711.4            | 27.1             | 72.9             |
| 2Na10Fe/SiO <sub>2</sub> -Spent       | 709.6                | 711.5            | 16.0             | 84.0             |
| 1Pd/2Na10Fe/SiO <sub>2</sub> -Spent   | 709.5                | 711.3            | 23.1             | 76.9             |

**Table S5.** The results of XPS for O 1s

| Catalysts                           | Binding energy (eV) |         |         | Content (atom%) |         |         |
|-------------------------------------|---------------------|---------|---------|-----------------|---------|---------|
|                                     | O 1s                |         |         | Si-O            | Vacancy | Lattice |
|                                     | Si-O                | Vacancy | Lattice |                 |         |         |
| 10Fe/SiO <sub>2</sub> -Spent        | 533.1               | 531.0   | 530.0   | 97.1            | 0.1     | 0.2     |
| 1Pd/10Fe/SiO <sub>2</sub> -Spent    | 532.8               | 531.0   | 530.0   | 93.4            | 3.7     | 2.9     |
| 2Na10Fe/SiO <sub>2</sub> -Spent     | 532.7               | 531.0   | 530.0   | 95.3            | 0.8     | 3.9     |
| 1Pd/2Na10Fe/SiO <sub>2</sub> -Spent | 532.6               | 531.0   | 530.0   | 90.1            | 6.3     | 3.6     |

The peak at about 530.0, 531.0, 532.8 eV corresponded to the lattice oxygen of iron oxides, the oxygen defects and lattice oxygen of Si-O species<sup>1-3</sup>. The density of oxygen vacancies could be reflected by content of oxygen defects<sup>4,5</sup>. As shown in Fig. S6 and Table S5, the density of oxygen defects ranked in the following order: 1Pd/2Na10Fe/SiO<sub>2</sub> > 1Pd/10Fe/SiO<sub>2</sub> > 2Na10Fe/SiO<sub>2</sub> > 10Fe/SiO<sub>2</sub>, indicating the Pd species could facilitate the formation of oxygen vacancies.

**Table S6.** Mössbauer parameters of the reduced and spent catalysts

| Catalysts                             | Phases                 | Mössbauer parameters |           |          |
|---------------------------------------|------------------------|----------------------|-----------|----------|
|                                       |                        | IS (mm/s)            | QS (mm/s) | Area (%) |
| 10Fe/SiO <sub>2</sub> -Reduced        | Fe <sup>2+</sup> (spm) | 0.70                 | 1.10      | 7.0      |
|                                       | Fe <sup>3+</sup> (spm) | 0.34                 | 0.82      | 93.0     |
| 1Pd/10Fe/SiO <sub>2</sub> -Reduced    | Fe <sup>2+</sup> (spm) | 0.93                 | 1.60      | 15.6     |
|                                       | Fe <sup>3+</sup> (spm) | 0.33                 | 0.99      | 84.4     |
| 2Na10Fe/SiO <sub>2</sub> -Reduced     | Fe <sup>2+</sup> (spm) | 1.17                 | 1.85      | 4.1      |
|                                       | Fe <sup>3+</sup> (spm) | 0.34                 | 0.88      | 95.9     |
| 1Pd/2Na10Fe/SiO <sub>2</sub> -Reduced | Fe <sup>2+</sup> (spm) | 0.71                 | 2.00      | 12.4     |
|                                       | Fe <sup>3+</sup> (spm) | 0.36                 | 0.84      | 87.6     |
| 10Fe/SiO <sub>2</sub> -Spent          | Fe <sup>2+</sup> (spm) | 0.70                 | 0.98      | 19.2     |
|                                       | Fe <sup>3+</sup> (spm) | 0.33                 | 0.86      | 80.8     |
| 1Pd/10Fe/SiO <sub>2</sub> -Spent      | Fe <sup>2+</sup> (spm) | 1.11                 | 1.94      | 32.2     |
|                                       | Fe <sup>3+</sup> (spm) | 0.33                 | 0.98      | 67.8     |
| 2Na10Fe/SiO <sub>2</sub> -Spent       | Fe <sup>2+</sup> (spm) | 0.93                 | 1.60      | 17.3     |
|                                       | Fe <sup>3+</sup> (spm) | 0.33                 | 0.99      | 82.7     |
| 1Pd/2Na10Fe/SiO <sub>2</sub> -Spent   | Fe <sup>2+</sup> (spm) | 1.08                 | 1.89      | 29.0     |
|                                       | Fe <sup>3+</sup> (spm) | 0.35                 | 0.90      | 71.0     |

**Table S7.** The results of XPS for Pd 3d<sub>5/2</sub>

| Catal.                                | Binding energy (eV)  |                  |                  | Content (atom%) |                  |                  |
|---------------------------------------|----------------------|------------------|------------------|-----------------|------------------|------------------|
|                                       | Pd 3d <sub>5/2</sub> |                  |                  | Pd <sup>0</sup> | Pd <sup>δ+</sup> | Pd <sup>2+</sup> |
|                                       | Pd <sup>0</sup>      | Pd <sup>δ+</sup> | Pd <sup>2+</sup> |                 |                  |                  |
| 1Pd/10Fe/SiO <sub>2</sub> -Reduced    | 335.1                | -                | 337.0            | 80.0            | -                | 20.0             |
| 1Pd/2Na10Fe/SiO <sub>2</sub> -Reduced | 335.0                | -                | 336.7            | 82.0            | -                | 18.0             |
| 1Pd/10Fe/SiO <sub>2</sub> -Spent      | 335.1                | -                | 336.8            | 75.0            | -                | 25.0             |
| 1Pd/2Na10Fe/SiO <sub>2</sub> -Spent   | 334.6                | 335.5            | 336.7            | 51.0            | 25.0             | 24.0             |

**Table S8.** The integration results of CO<sub>2</sub>-TPD profiles

| Catalysts                           | Peak area (a.u.)       |                          |                          | Content (%)            |                       |                       |
|-------------------------------------|------------------------|--------------------------|--------------------------|------------------------|-----------------------|-----------------------|
|                                     | Weak<br>basic<br>sites | Medium<br>basic<br>sites | Strong<br>basic<br>sites | Weak<br>basic<br>sites | Medium<br>basic sites | Strong<br>basic sites |
| 10Fe/SiO <sub>2</sub> -Spent        | 1129                   | 1861                     | 2285                     | 21.4                   | 35.3                  | 43.3                  |
| 1Pd/10Fe/SiO <sub>2</sub> -Spent    | 908                    | 3169                     | 2666                     | 13.5                   | 47.0                  | 39.5                  |
| 2Na10Fe/SiO <sub>2</sub> -Spent     | 1708                   | 3713                     | 2143                     | 22.6                   | 49.1                  | 28.3                  |
| 1Pd/2Na10Fe/SiO <sub>2</sub> -Spent | 1419                   | 4025                     | 3478                     | 15.9                   | 45.1                  | 39.0                  |

- (1) Lu, F.; Chen, X.; Wang, W.; Zhang, Y. Adjusting the CO<sub>2</sub> Hydrogenation Pathway via the Synergic Effects of Iron Carbides and Iron Oxides. *Catal. Sci. Technol.* **2021**, *11* (23), 7694–7703. <https://doi.org/10.1039/D1CY01758F>.
- (2) Chen, Y.; Wang, C.; Liu, Y.; Zhang, Q.; Zhou, L.; Zhang, Y. The Pd/ZrO<sub>2</sub> Catalyst Inversely Loaded with Various Metal Oxides for Methanol Synthesis from Carbon Dioxide. *J. Catal.* **2024**, *434*, 115527. <https://doi.org/10.1016/j.jcat.2024.115527>.
- (3) Paparazzo, E. XPS Analysis of Oxides. *Surf. Interface Anal.* **1988**, *12* (2), 115–118. <https://doi.org/10.1002/sia.740120210>.
- (4) Huang, C.; Wu, Z.; Luo, H.; Zhang, S.; Shao, Z.; Wang, H.; Sun, Y. CO<sub>2</sub> Hydrogenation to Methanol over PdZnZr Solid Solution: Effects of the PdZn Alloy and Oxygen Vacancy. *ACS Appl. Energy Mater.* **2021**, *4* (9), 9258–9266. <https://doi.org/10.1021/acsaem.1c01502>.
- (5) Jiang, F.; Wang, S.; Liu, B.; Liu, J.; Wang, L.; Xiao, Y.; Xu, Y.; Liu, X. Insights into the Influence of CeO<sub>2</sub> Crystal Facet on CO<sub>2</sub> Hydrogenation to Methanol over Pd/CeO<sub>2</sub> Catalysts. *ACS Catal.* **2020**, *10* (19), 11493–11509. <https://doi.org/10.1021/acscatal.0c03324>.
